# Supplementary material for: Atmospheric drivers of melt-related ice speed-up events on the Russell Glacier in southwest Greenland
Source: Copernicus journal article supplement (doi:10.5194/tc-17-3933-2023), 2023-09-13
Supplement: Supplementary file 1 [file tc-17-3933-2023-supplement.pdf]

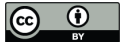

*Supplement of*

## **Atmospheric drivers of melt-related ice speed-up events on the Russell Glacier in southwest Greenland**

**Timo Schmid et al.**

*Correspondence to:* Timo Schmid ([timo.schmid@usys.ethz.ch](mailto:timo.schmid@usys.ethz.ch))

The copyright of individual parts of the supplement might differ from the article licence.

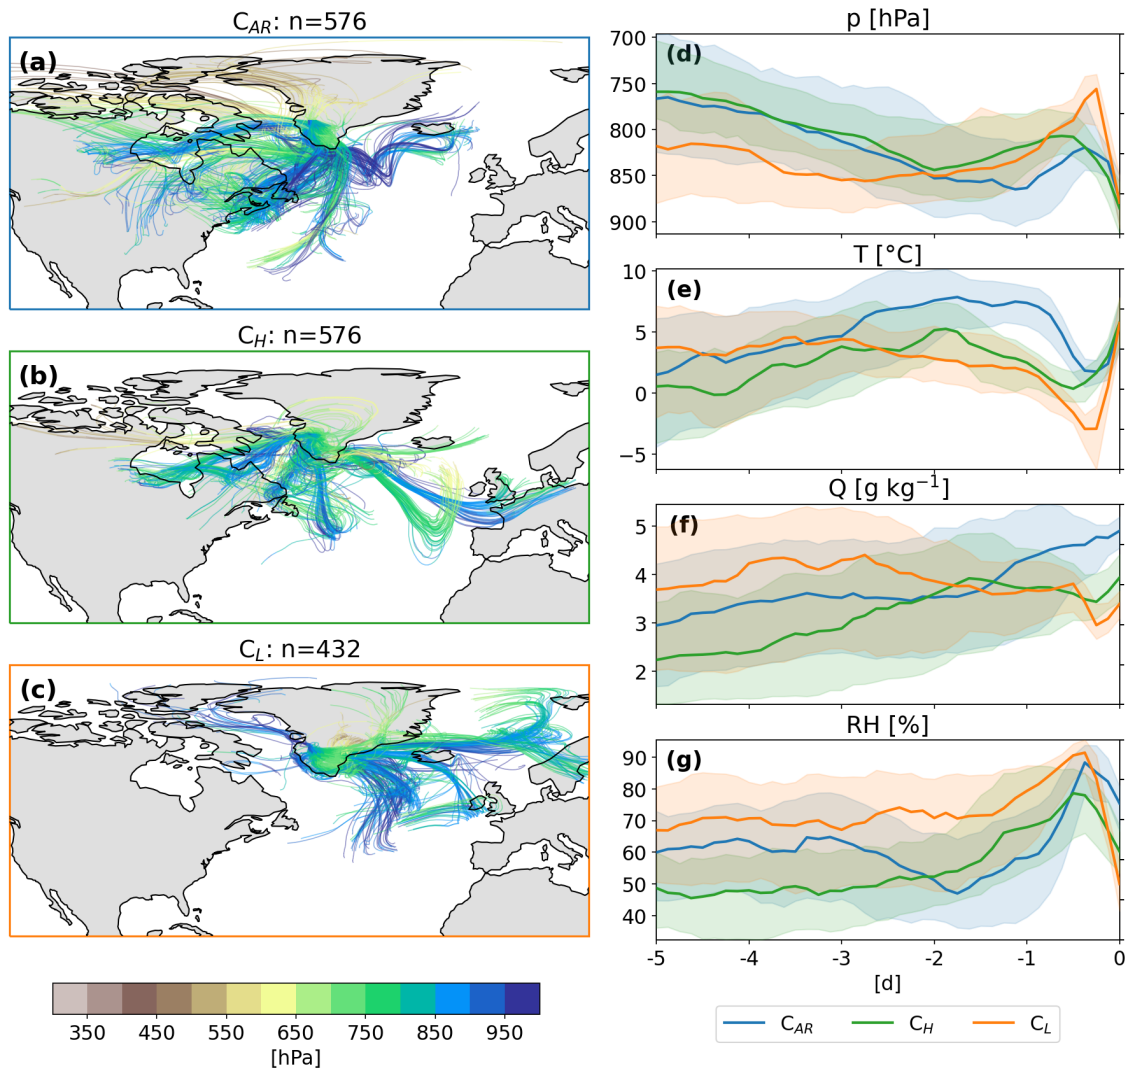

**Figure S1.** (a–c) 5-day backwards trajectories colored according to their vertical level for all MI-days in each cluster. Trajectories are started at 10&30 hPa above the ground level at eight locations in the Russell Glacier ablation area at 9, 12, and 15 UTC-3. (d–g) median temporal evolution of pressure (p), temperature (T), absolute moisture (Q), and relative humidity (RH) for all air masses within the same cluster, with the respective intertercile (33<sup>th</sup>–66<sup>th</sup> percentile) range shaded.

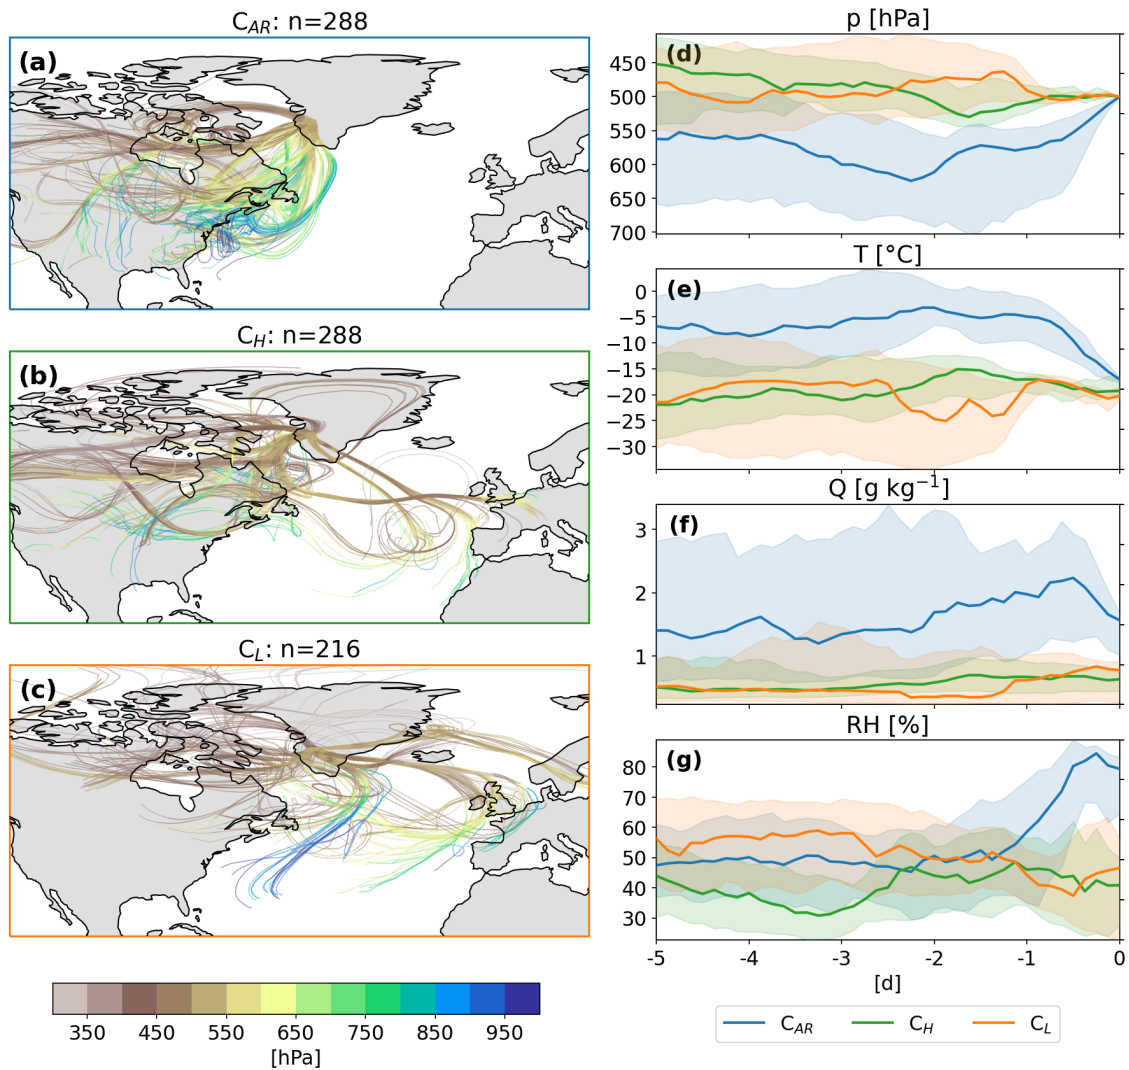

**Figure S2.** (a–c) 5-day backwards trajectories colored according to their vertical level for all MI-days in each cluster. Trajectories are started at 500 hPa at eight locations in the Russell Glacier ablation area at 9, 12, and 15 UTC-3. (d–g) median temporal evolution of pressure (p), temperature (T), absolute moisture (Q), and relative humidity (RH) for all air masses within the same cluster, with the respective intertercile (33<sup>th</sup>–66<sup>th</sup> percentile) range shaded.

**Table S1.** Data for each ice speed-up event. "Max. melt-increase" refers to the MI-day and "Total melt-increase" to all consecutive days where all datasets agree on increasing melt. "Accelerating stations" are defined by a  $>50 \text{ m year}^{-1}$  increase in local ice velocities during the speed-up event.

| Date (start)   | duration [d] | Total ice velocity increase [ $\text{m year}^{-1}$ ] | Max. melt-increase [ $\text{mm d}^{-2}$ ] | Total melt-increase [ $\text{mm d}^{-1}$ event $^{-1}$ ] | Lag (MI-day vs. start date) [d] | Max. DMI rainfall increase [ $\text{mm d}^{-2}$ ] | Max. MAR rainfall increase [ $\text{mm d}^{-2}$ ] | Total lake drainage area [ $\text{km}^2$ ] | Spring event (per station) | Accelerating stations | Stations with missing data | #days with consecutive melt increase | SOM nodes during melt increase |   |
|----------------|--------------|------------------------------------------------------|-------------------------------------------|----------------------------------------------------------|---------------------------------|---------------------------------------------------|---------------------------------------------------|--------------------------------------------|----------------------------|-----------------------|----------------------------|--------------------------------------|--------------------------------|---|
| 18/05/2009     | 3            | 30.1                                                 | -                                         | -                                                        | -                               | -                                                 | 0.4                                               | -                                          | L1                         | L1                    | -                          | -                                    | -                              |   |
| 01/06/2009     | 3            | 62.8                                                 | 12.2                                      | 12.2                                                     | 1                               | 0.3                                               | -                                                 | -                                          | L3                         | L1,2,3                | -                          | 1                                    | 5                              |   |
| 06/06/2009     | 2            | 27.7                                                 | 13.0                                      | 13.0                                                     | -1                              | 2                                                 | -                                                 | 0.1                                        | -                          | L2-3                  | -                          | 1                                    | 5                              |   |
| 15/06/2009     | 3            | 51.9                                                 | 4.6                                       | 4.6                                                      | 0                               | 4.6                                               | -                                                 | 1.5                                        | -                          | L1,2,3                | -                          | 1                                    | 20                             |   |
| 27/06/2009     | 4            | 27.7                                                 | 5.4                                       | 9.6                                                      | 0                               | 4.6                                               | 2.0                                               | 1.5                                        | -                          | L2                    | -                          | 2                                    | 4, 4                           |   |
| 02/07/2009     | 2            | 69.4                                                 | -                                         | -                                                        | 0                               | 1.01                                              | 0.8                                               | -                                          | -                          | L2,3                  | -                          | -                                    | -                              |   |
| 07/07/2009     | 2            | 61.8                                                 | 17.4                                      | 17.4                                                     | -1                              | -                                                 | -                                                 | 0.4                                        | -                          | L2,3                  | -                          | 1                                    | 15                             |   |
| 10/07/2009     | 3            | 29.3                                                 | 6.6                                       | 6.6                                                      | 0                               | 1.7                                               | 0.1                                               | 0.4                                        | -                          | L3,5                  | -                          | 1                                    | 20                             |   |
| 20/07/2009     | 2            | 24.8                                                 | -                                         | -                                                        | -                               | -                                                 | -                                                 | 4.7                                        | -                          | L5                    | -                          | -                                    | -                              |   |
| 26/07/2009     | 5            | 42.4                                                 | -                                         | -                                                        | -                               | 0.81                                              | -                                                 | 4.8                                        | -                          | L4,5,6                | -                          | -                                    | -                              |   |
| 10/09/2009     | 2            | 23.3                                                 | 4.0                                       | 4.0                                                      | 0                               | 3.99                                              | 4.0                                               | -                                          | -                          | L2                    | L5                         | 1                                    | 1                              |   |
| 07/05/2010     | 4            | 68.0                                                 | 19.8                                      | 20.2                                                     | 0                               | 0.02                                              | -                                                 | -                                          | L2,3                       | L1,2,3                | L4                         | 2                                    | 5, 5                           |   |
| 16/05/2010     | 7            | 124.1                                                | 15.3                                      | 23.3                                                     | 5                               | 0.01                                              | 0.5                                               | 0.1                                        | -                          | L1,2,3                | L4                         | 2                                    | 3, 3                           |   |
| 29/05/2010     | 2            | 18.8                                                 | -                                         | -                                                        | 0                               | 0.01                                              | -                                                 | -                                          | -                          | -                     | L4                         | 2                                    | -                              |   |
| 05/06/2010     | 1            | 54.8                                                 | 15.1                                      | 21.3                                                     | 0                               | -                                                 | -                                                 | -                                          | -                          | L2,3                  | L4                         | 2                                    | 14, 20                         |   |
| 16/06/2010     | 3            | 65.3                                                 | 11.5                                      | 33.2                                                     | 1                               | 14                                                | 0.8                                               | -                                          | -                          | L2,3                  | L4                         | 3                                    | 2, 1, 1                        |   |
| 24/06/2010     | 3            | 55.0                                                 | 15.3                                      | 15.3                                                     | 0                               | -                                                 | 0.4                                               | 2.8                                        | -                          | L2,3,5                | L4                         | 1                                    | 20                             |   |
| 17/07/2010     | 3            | 33.6                                                 | 9.3                                       | 9.3                                                      | 0                               | -                                                 | -                                                 | 0.9                                        | -                          | L5                    | L4                         | 1                                    | 20                             |   |
| 27/07/2010     | 4            | 34.6                                                 | 7.5                                       | 14.5                                                     | 0                               | 0.01                                              | 3.6                                               | -                                          | -                          | L2,3                  | L4                         | 2                                    | 15, 16                         |   |
| 12/08/2010     | 2            | 18.1                                                 | -                                         | -                                                        | 0                               | -                                                 | 0.2                                               | -                                          | -                          | L3                    | L5                         | 1                                    | -                              |   |
| 27/08/2010     | 1            | 17.5                                                 | 4.5                                       | 4.5                                                      | 0                               | 17.2                                              | 6.4                                               | -                                          | -                          | L2                    | L1,4,5                     | 1                                    | 8                              |   |
| 02/06/2011     | 8            | 112.7                                                | 12.4                                      | 12.4                                                     | 3                               | 1.2                                               | 0.7                                               | -                                          | L1,2,3                     | L1,2,3                | -                          | 1                                    | 7                              |   |
| 14/06/2011     | 2            | 42.7                                                 | 14.0                                      | 14.0                                                     | 0                               | -                                                 | -                                                 | 1.1                                        | -                          | L2,3,4                | -                          | 1                                    | 14                             |   |
| 21/06/2011     | 2            | 60.8                                                 | 6.5                                       | 6.5                                                      | 1                               | 0.01                                              | 0.2                                               | 0.1                                        | -                          | L2,3,4                | -                          | 1                                    | 5                              |   |
| 06/07/2011     | 2            | 52.5                                                 | 16.2                                      | 16.2                                                     | 0                               | 1.99                                              | 6.8                                               | 3.4                                        | -                          | L3,4,5                | -                          | 1                                    | 3                              |   |
| 11/07/2011     | 2            | 39.1                                                 | 16.9                                      | 21.1                                                     | 1                               | -                                                 | 1.8                                               | -                                          | -                          | L2,3                  | -                          | 2                                    | 15, 19                         |   |
| 19/07/2011     | 2            | 57.1                                                 | 18.1                                      | 18.1                                                     | -1                              | -                                                 | 5.3                                               | -                                          | -                          | L4,5,6                | -                          | 1                                    | 11                             |   |
| 09/07/2011     | 2            | 21.9                                                 | 17.8                                      | 17.8                                                     | 1                               | -                                                 | 7.6                                               | -                                          | -                          | L3,4                  | L1,2                       | 1                                    | 9                              |   |
| 03/08/2011     | 1            | 17.6                                                 | -                                         | -                                                        | -                               | -                                                 | 1.8                                               | -                                          | -                          | L4                    | L1,2                       | 1                                    | 9                              |   |
| 06/08/2011     | 2            | 21.9                                                 | 6.5                                       | 6.5                                                      | 0                               | -                                                 | 0.1                                               | -                                          | -                          | -                     | L1,2                       | 1                                    | 9                              |   |
| 25/08/2011     | 1            | 32.8                                                 | 2.8                                       | 2.8                                                      | -1                              | 3.2                                               | 1.6                                               | -                                          | -                          | L3                    | L1,2                       | 1                                    | 3                              |   |
| 27/08/2011     | 1            | 53.5                                                 | 7.6                                       | 12.5                                                     | 0                               | 10                                                | 3.9                                               | -                                          | -                          | L4,5,6                | L1,2                       | 2                                    | 8, 2                           |   |
| 09/09/2011     | 2            | 22.6                                                 | -                                         | -                                                        | 0                               | 0.01                                              | 0.2                                               | -                                          | -                          | L2                    | L5                         | 2                                    | -                              |   |
| 05/05/2012     | 4            | 20.0                                                 | 5.1                                       | 9.9                                                      | 1                               | 1.1                                               | 0.9                                               | -                                          | L1                         | L1                    | L5                         | 3                                    | 5, 5, 5                        |   |
| 27/05/2012     | 2            | 92.8                                                 | 21.9                                      | 32.5                                                     | 0                               | 6.99                                              | 2.9                                               | -                                          | L3                         | L1,2,3                | L5                         | 3                                    | 8, 2, 5                        |   |
| 14/06/2012     | 2            | 48.4                                                 | 11.9                                      | 11.9                                                     | 0                               | 2.4                                               | 4.4                                               | -                                          | -                          | L2,3                  | L5                         | 1                                    | 4                              |   |
| 18/06/2012     | 3            | 30.1                                                 | 17.6                                      | 17.6                                                     | 1                               | -                                                 | -                                                 | 3.4                                        | -                          | L4                    | L5                         | 1                                    | 9                              |   |
| 23/06/2012     | 3            | 55.4                                                 | 23.8                                      | 23.8                                                     | 0                               | 10.3                                              | 4.6                                               | 4.8                                        | -                          | L3,4,6                | L5                         | 1                                    | 5                              |   |
| 05/07/2012     | 2            | 27.1                                                 | 5.6                                       | 5.6                                                      | 0                               | 5.19                                              | 7.9                                               | -                                          | -                          | L3                    | L5                         | 1                                    | 3                              |   |
| 08/07/2012     | 3            | 98.6                                                 | 17.2                                      | 29.7                                                     | 1                               | 3                                                 | 3.6                                               | 0.1                                        | -                          | L2,3,4,6              | L5                         | 2                                    | 3, 3                           |   |
| 23/07/2012     | 1            | 15.5                                                 | -                                         | -                                                        | -                               | 0.01                                              | 1.8                                               | -                                          | -                          | -                     | L5                         | -                                    | -                              | - |
| 25/07/2012     | 4            | 160.4                                                | 18.0                                      | 39.6                                                     | 2                               | 2.99                                              | 3.0                                               | -                                          | -                          | L2,3,4,6              | L5                         | 3                                    | 3, 3, 3                        |   |
| 14/08/2012     | 3            | 22.8                                                 | 17.8                                      | 17.8                                                     | 1                               | 3.99                                              | 5.7                                               | -                                          | -                          | L4                    | L1,2,3,5                   | 1                                    | 4                              |   |
| 09/09/2012     | 4            | 23.8                                                 | 9.5                                       | 9.5                                                      | 1                               | 2                                                 | 0.4                                               | -                                          | -                          | L3                    | L2                         | 1                                    | 7                              |   |
| 19/09/2012     | 3            | 22.7                                                 | 10.2                                      | 16.1                                                     | 1                               | 2.3                                               | 4.0                                               | -                                          | -                          | L4                    | L2,3,5,6                   | 3                                    | 15, 8, 7                       |   |
| <b>Average</b> | -            | <b>46.5</b>                                          | <b>9.8</b>                                | <b>12.2</b>                                              | -                               | <b>2.3</b>                                        | <b>2.0</b>                                        | <b>0.7</b>                                 | -                          | -                     | -                          | -                                    | -                              |   |
